# Supplementary material
Source: publisher figshare collection journal article supplement (https://tandf.figshare.com/ndownloader/files/22964783)
Supplement: Supplementary file 1 [file 22964783]

Plate	Type	Concentration	Response
1	Reference	1	0.894131916
1	Reference	0.5	1.045982368
1	Reference	0.25	0.891077788
1	Reference	0.125	0.727183075
1	Reference	0.0625	0.447795963
1	Reference	0.03125	0.210908815
1	Reference	0.015625	0.020587324
1	Reference	0.0078125	-0.057954142
1	Reference	0.00390625	0.032393999
1	Reference	0.001953125	-0.050266058
1	Reference	1	0.935233585
1	Reference	0.5	0.878393179
1	Reference	0.25	0.939488254
1	Reference	0.125	0.727937716
1	Reference	0.0625	0.434351354
1	Reference	0.03125	0.162866439
1	Reference	0.015625	-0.026181337
1	Reference	0.0078125	-0.04392486
1	Reference	0.00390625	-0.10534577
1	Reference	0.001953125	-0.066132931
1	Reference	1	0.921275807
1	Reference	0.5	0.901895732
1	Reference	0.25	0.95684819
1	Reference	0.125	0.698285234
1	Reference	0.0625	0.427055125
1	Reference	0.03125	0.173898192
1	Reference	0.015625	0.005556332
1	Reference	0.0078125	-0.033969613
1	Reference	0.00390625	-0.051709697
1	Reference	0.001953125	-0.061682566
1	Sample	1	0.986690913
1	Sample	0.5	0.985083939
1	Sample	0.25	0.907971877
1	Sample	0.125	0.925128168
1	Sample	0.0625	0.755652688
1	Sample	0.03125	0.456187631
1	Sample	0.015625	0.194658816
1	Sample	0.0078125	0.087792289
1	Sample	0.00390625	0.097988896
1	Sample	0.001953125	-0.034722646
1	Sample	1	1.093177801
1	Sample	0.5	0.95203601
1	Sample	0.25	1.031102863
1	Sample	0.125	1.081681518
1	Sample	0.0625	0.80935915
1	Sample	0.03125	0.473454052
1	Sample	0.015625	0.202394055
1	Sample	0.0078125	0.14849372
1	Sample	0.00390625	-0.041332364
1	Sample	0.001953125	0.072336384
1	Sample	1	1.079360559
1	Sample	0.5	1.026750077
1	Sample	0.25	0.998618082
1	Sample	0.125	0.931458527
1	Sample	0.0625	0.792770973
1	Sample	0.03125	0.539350059
1	Sample	0.015625	0.306287835
1	Sample	0.0078125	0.051969577
1	Sample	0.00390625	-0.053937025
1	Sample	0.001953125	-0.032234064
2	Reference	1	1.063033116
2	Reference	0.5	1.022150302
2	Reference	0.25	0.983319499
2	Reference	0.125	0.834877943
2	Reference	0.0625	0.458495935
2	Reference	0.03125	0.202155053
2	Reference	0.015625	0.104524675
2	Reference	0.0078125	0.051099236
2	Reference	0.00390625	0.031601899
2	Reference	0.001953125	-0.019108089
2	Reference	1	1.040540339
2	Reference	0.5	0.978276864
2	Reference	0.25	0.989551056
2	Reference	0.125	0.856137447
2	Reference	0.0625	0.61240923
2	Reference	0.03125	0.260920074
2	Reference	0.015625	0.03723389
2	Reference	0.0078125	0.033996316
2	Reference	0.00390625	-0.052628371
2	Reference	0.001953125	0.044938691
2	Reference	1	1.098765865
2	Reference	0.5	1.144059113
2	Reference	0.25	1.012935173
2	Reference	0.125	0.819641723
2	Reference	0.0625	0.530410704
2	Reference	0.03125	0.185720523
2	Reference	0.015625	0.020713133
2	Reference	0.0078125	0.024568265
2	Reference	0.00390625	-0.0407112
2	Reference	0.001953125	0.009437779
2	Sample	1	0.899602342
2	Sample	0.5	0.87667517
2	Sample	0.25	0.859338151
2	Sample	0.125	0.798337209
2	Sample	0.0625	0.65068373
2	Sample	0.03125	0.483821268
2	Sample	0.015625	0.177661149
2	Sample	0.0078125	0.093481449
2	Sample	0.00390625	-0.04863416
2	Sample	0.001953125	0.01188601
2	Sample	1	0.915512245
2	Sample	0.5	0.877966607
2	Sample	0.25	0.859565274
2	Sample	0.125	0.791695364
2	Sample	0.0625	0.809080191
2	Sample	0.03125	0.47888263
2	Sample	0.015625	0.267753438
2	Sample	0.0078125	0.055927401
2	Sample	0.00390625	-0.017990232
2	Sample	0.001953125	-0.072229717
2	Sample	1	0.850048938
2	Sample	0.5	0.890595502
2	Sample	0.25	0.9198194
2	Sample	0.125	0.843428203
2	Sample	0.0625	0.647574676
2	Sample	0.03125	0.474793274
2	Sample	0.015625	0.094037976
2	Sample	0.0078125	0.033631806
2	Sample	0.00390625	-0.002225684
2	Sample	0.001953125	-0.093977613
3	Reference	1	1.063484573
3	Reference	0.5	0.974597943
3	Reference	0.25	0.944668741
3	Reference	0.125	0.886922382
3	Reference	0.0625	0.542561838
3	Reference	0.03125	0.198869662
3	Reference	0.015625	0.0857738
3	Reference	0.0078125	0.035678302
3	Reference	0.00390625	0.08711736
3	Reference	0.001953125	0.014791213
3	Reference	1	1.042795328
3	Reference	0.5	1.023119122
3	Reference	0.25	0.942508691
3	Reference	0.125	0.822045961
3	Reference	0.0625	0.592665349
3	Reference	0.03125	0.160511623
3	Reference	0.015625	0.066173661
3	Reference	0.0078125	0.083821244
3	Reference	0.00390625	-0.007756516
3	Reference	0.001953125	-0.051672598
3	Reference	1	0.973992516
3	Reference	0.5	0.986235172
3	Reference	0.25	0.91900307
3	Reference	0.125	0.804133018
3	Reference	0.0625	0.490007132
3	Reference	0.03125	0.195138707
3	Reference	0.015625	0.080438466
3	Reference	0.0078125	0.046946368
3	Reference	0.00390625	0.087884825
3	Reference	0.001953125	-0.00243814
3	Sample	1	1.008260504
3	Sample	0.5	1.094863575
3	Sample	0.25	1.094745375
3	Sample	0.125	0.967153067
3	Sample	0.0625	0.80360937
3	Sample	0.03125	0.421539626
3	Sample	0.015625	0.275623679
3	Sample	0.0078125	0.018432807
3	Sample	0.00390625	-0.040414251
3	Sample	0.001953125	0.156177799
3	Sample	1	1.036053565
3	Sample	0.5	1.019650359
3	Sample	0.25	0.872917929
3	Sample	0.125	0.960001336
3	Sample	0.0625	0.869043822
3	Sample	0.03125	0.533344843
3	Sample	0.015625	0.250676667
3	Sample	0.0078125	0.159498539
3	Sample	0.00390625	0.074229315
3	Sample	0.001953125	-0.021447346
3	Sample	1	1.059511508
3	Sample	0.5	1.011392476
3	Sample	0.25	0.982625366
3	Sample	0.125	0.822202933
3	Sample	0.0625	0.780759893
3	Sample	0.03125	0.537042129
3	Sample	0.015625	0.313462186
3	Sample	0.0078125	0.08534666
3	Sample	0.00390625	0.046784399
3	Sample	0.001953125	-0.044305655
4	Reference	1	0.975616504
4	Reference	0.5	0.852408617
4	Reference	0.25	0.938391225
4	Reference	0.125	0.811848841
4	Reference	0.0625	0.494907197
4	Reference	0.03125	0.229289276
4	Reference	0.015625	0.072717169
4	Reference	0.0078125	0.052965626
4	Reference	0.00390625	0.095902415
4	Reference	0.001953125	0.056565716
4	Reference	1	0.969116966
4	Reference	0.5	0.900598046
4	Reference	0.25	0.935032775
4	Reference	0.125	0.75699864
4	Reference	0.0625	0.560306156
4	Reference	0.03125	0.113898553
4	Reference	0.015625	0.036345528
4	Reference	0.0078125	0.036042926
4	Reference	0.00390625	-0.003807593
4	Reference	0.001953125	-0.029359982
4	Reference	1	0.952247715
4	Reference	0.5	0.987797299
4	Reference	0.25	0.958888483
4	Reference	0.125	0.810021033
4	Reference	0.0625	0.599305677
4	Reference	0.03125	0.252927479
4	Reference	0.015625	0.071518604
4	Reference	0.0078125	-0.018045997
4	Reference	0.00390625	0.14973624
4	Reference	0.001953125	0.034818349
4	Sample	1	0.934667688
4	Sample	0.5	0.967028882
4	Sample	0.25	0.899232954
4	Sample	0.125	0.764399515
4	Sample	0.0625	0.439659037
4	Sample	0.03125	0.200375949
4	Sample	0.015625	0.073173801
4	Sample	0.0078125	-0.038912977
4	Sample	0.00390625	-0.157872905
4	Sample	0.001953125	-0.011794788
4	Sample	1	0.970359597
4	Sample	0.5	0.987417967
4	Sample	0.25	0.918409377
4	Sample	0.125	0.798804671
4	Sample	0.0625	0.431445595
4	Sample	0.03125	0.230092444
4	Sample	0.015625	0.093160225
4	Sample	0.0078125	0.027546683
4	Sample	0.00390625	0.071648424
4	Sample	0.001953125	0.021172368
4	Sample	1	0.982101919
4	Sample	0.5	0.971106473
4	Sample	0.25	0.937299147
4	Sample	0.125	0.831140921
4	Sample	0.0625	0.508943723
4	Sample	0.03125	0.227693612
4	Sample	0.015625	0.000397111
4	Sample	0.0078125	-0.003560747
4	Sample	0.00390625	0.077633181
4	Sample	0.001953125	-0.060246243
5	Reference	1	0.980899584
5	Reference	0.5	0.977077119
5	Reference	0.25	0.96340419
5	Reference	0.125	0.759978083
5	Reference	0.0625	0.493819972
5	Reference	0.03125	0.106192727
5	Reference	0.015625	0.074093179
5	Reference	0.0078125	-0.01837783
5	Reference	0.00390625	-0.008151096
5	Reference	0.001953125	-0.058440189
5	Reference	1	0.987242931
5	Reference	0.5	0.990155954
5	Reference	0.25	0.899383329
5	Reference	0.125	0.868672473
5	Reference	0.0625	0.519416669
5	Reference	0.03125	0.241787109
5	Reference	0.015625	0.159633527
5	Reference	0.0078125	-0.017605259
5	Reference	0.00390625	0.044212199
5	Reference	0.001953125	0.050277106
5	Reference	1	0.967687625
5	Reference	0.5	0.972779596
5	Reference	0.25	0.864022928
5	Reference	0.125	0.800930297
5	Reference	0.0625	0.450840183
5	Reference	0.03125	0.235039623
5	Reference	0.015625	0.016591837
5	Reference	0.0078125	0.030920296
5	Reference	0.00390625	-0.038544898
5	Reference	0.001953125	-0.011340083
5	Sample	1	0.874137267
5	Sample	0.5	0.947219839
5	Sample	0.25	0.948564507
5	Sample	0.125	0.773560863
5	Sample	0.0625	0.389437594
5	Sample	0.03125	0.160072937
5	Sample	0.015625	0.139007923
5	Sample	0.0078125	0.10519024
5	Sample	0.00390625	-0.055033947
5	Sample	0.001953125	-0.01740297
5	Sample	1	0.96946149
5	Sample	0.5	0.956755949
5	Sample	0.25	0.870294488
5	Sample	0.125	0.716734552
5	Sample	0.0625	0.468777625
5	Sample	0.03125	0.241590032
5	Sample	0.015625	0.057387102
5	Sample	0.0078125	-0.01775144
5	Sample	0.00390625	-0.02150082
5	Sample	0.001953125	0.081651768
5	Sample	1	0.929432227
5	Sample	0.5	0.978956976
5	Sample	0.25	0.972878272
5	Sample	0.125	0.786581732
5	Sample	0.0625	0.456662961
5	Sample	0.03125	0.18909954
5	Sample	0.015625	0.031591773
5	Sample	0.0078125	0.076085827
5	Sample	0.00390625	-0.003759787
5	Sample	0.001953125	0.078431362
6	Reference	1	0.944261527
6	Reference	0.5	0.928766958
6	Reference	0.25	0.925876951
6	Reference	0.125	0.782121724
6	Reference	0.0625	0.462847606
6	Reference	0.03125	0.116158233
6	Reference	0.015625	0.058923343
6	Reference	0.0078125	-0.020811291
6	Reference	0.00390625	0.057928759
6	Reference	0.001953125	-0.046681941
6	Reference	1	1.02866629
6	Reference	0.5	0.92867067
6	Reference	0.25	0.933343847
6	Reference	0.125	0.825847428
6	Reference	0.0625	0.462133065
6	Reference	0.03125	0.222950001
6	Reference	0.015625	0.053021338
6	Reference	0.0078125	-0.041743102
6	Reference	0.00390625	-0.009705769
6	Reference	0.001953125	0.081941826
6	Reference	1	0.961635595
6	Reference	0.5	0.920233698
6	Reference	0.25	0.916019197
6	Reference	0.125	0.797419373
6	Reference	0.0625	0.535836413
6	Reference	0.03125	0.252426067
6	Reference	0.015625	0.062446141
6	Reference	0.0078125	0.073246306
6	Reference	0.00390625	-0.034414786
6	Reference	0.001953125	-0.116273338
6	Sample	1	0.922799695
6	Sample	0.5	0.909671277
6	Sample	0.25	0.778391771
6	Sample	0.125	0.78818813
6	Sample	0.0625	0.435851582
6	Sample	0.03125	0.178713436
6	Sample	0.015625	-0.023468051
6	Sample	0.0078125	0.041992836
6	Sample	0.00390625	0.098258163
6	Sample	0.001953125	-0.042976948
6	Sample	1	0.94075592
6	Sample	0.5	1.032899705
6	Sample	0.25	0.940884396
6	Sample	0.125	0.855717513
6	Sample	0.0625	0.474778636
6	Sample	0.03125	0.182403133
6	Sample	0.015625	0.030405516
6	Sample	0.0078125	0.086345311
6	Sample	0.00390625	-0.060595115
6	Sample	0.001953125	0.016292619
6	Sample	1	0.944067939
6	Sample	0.5	1.048056142
6	Sample	0.25	0.863791893
6	Sample	0.125	0.684600134
6	Sample	0.0625	0.486671927
6	Sample	0.03125	0.188033701
6	Sample	0.015625	0.013930845
6	Sample	0.0078125	0.02123118
6	Sample	0.00390625	-0.010079425
6	Sample	0.001953125	-0.033011024
7	Reference	1	0.982489073
7	Reference	0.5	0.929816693
7	Reference	0.25	0.812897863
7	Reference	0.125	0.636362782
7	Reference	0.0625	0.451564544
7	Reference	0.03125	0.264946805
7	Reference	0.015625	0.098446899
7	Reference	0.0078125	0.075540176
7	Reference	0.00390625	0.052865301
7	Reference	0.001953125	0.016725945
7	Reference	1	0.882094145
7	Reference	0.5	0.956678298
7	Reference	0.25	0.98450828
7	Reference	0.125	0.599146667
7	Reference	0.0625	0.441526038
7	Reference	0.03125	0.247360693
7	Reference	0.015625	0.082977681
7	Reference	0.0078125	0.054257217
7	Reference	0.00390625	0.026595004
7	Reference	0.001953125	0.027879399
7	Reference	1	0.958179433
7	Reference	0.5	0.900575351
7	Reference	0.25	0.843306121
7	Reference	0.125	0.770757488
7	Reference	0.0625	0.459523997
7	Reference	0.03125	0.147269241
7	Reference	0.015625	0.077412496
7	Reference	0.0078125	0.022459734
7	Reference	0.00390625	0.076904181
7	Reference	0.001953125	-0.055137381
7	Sample	1	0.961899338
7	Sample	0.5	0.940462472
7	Sample	0.25	0.732188849
7	Sample	0.125	0.487376177
7	Sample	0.0625	0.165236029
7	Sample	0.03125	-0.048368836
7	Sample	0.015625	0.001242341
7	Sample	0.0078125	-0.022800017
7	Sample	0.00390625	0.057629264
7	Sample	0.001953125	-0.029958578
7	Sample	1	1.015664322
7	Sample	0.5	0.951341291
7	Sample	0.25	0.740735342
7	Sample	0.125	0.520318669
7	Sample	0.0625	0.195340282
7	Sample	0.03125	0.067316213
7	Sample	0.015625	0.048335942
7	Sample	0.0078125	0.009601737
7	Sample	0.00390625	0.080236712
7	Sample	0.001953125	0.00602254
7	Sample	1	0.92508879
7	Sample	0.5	0.981303066
7	Sample	0.25	0.741433272
7	Sample	0.125	0.405666764
7	Sample	0.0625	0.160147769
7	Sample	0.03125	0.021779253
7	Sample	0.015625	-0.014941097
7	Sample	0.0078125	0.08424157
7	Sample	0.00390625	0.082758726
7	Sample	0.001953125	0.036549423
8	Reference	1	0.980205234
8	Reference	0.5	1.033009343
8	Reference	0.25	1.010685194
8	Reference	0.125	0.831528387
8	Reference	0.0625	0.532574626
8	Reference	0.03125	0.162355245
8	Reference	0.015625	-0.002735445
8	Reference	0.0078125	0.086510975
8	Reference	0.00390625	0.017446357
8	Reference	0.001953125	-0.019397468
8	Reference	1	1.060160541
8	Reference	0.5	1.134976064
8	Reference	0.25	1.00446248
8	Reference	0.125	0.908949995
8	Reference	0.0625	0.592364567
8	Reference	0.03125	0.189236133
8	Reference	0.015625	0.099772657
8	Reference	0.0078125	-0.016437353
8	Reference	0.00390625	-0.069605066
8	Reference	0.001953125	-0.059060875
8	Reference	1	1.036460956
8	Reference	0.5	1.121705137
8	Reference	0.25	0.991569568
8	Reference	0.125	0.798237864
8	Reference	0.0625	0.5355061
8	Reference	0.03125	0.2444937
8	Reference	0.015625	-0.003114516
8	Reference	0.0078125	-0.036611323
8	Reference	0.00390625	-0.093002652
8	Reference	0.001953125	-0.062455615
8	Sample	1	0.934814004
8	Sample	0.5	0.921390777
8	Sample	0.25	0.866093283
8	Sample	0.125	0.541674934
8	Sample	0.0625	0.212545861
8	Sample	0.03125	0.030167087
8	Sample	0.015625	0.013289434
8	Sample	0.0078125	0.031250207
8	Sample	0.00390625	-0.024231436
8	Sample	0.001953125	0.053196242
8	Sample	1	1.034058623
8	Sample	0.5	0.877661333
8	Sample	0.25	0.758243015
8	Sample	0.125	0.557579799
8	Sample	0.0625	0.114536151
8	Sample	0.03125	0.079484655
8	Sample	0.015625	0.026974718
8	Sample	0.0078125	0.163664654
8	Sample	0.00390625	-0.135513787
8	Sample	0.001953125	-0.041797055
8	Sample	1	1.012887378
8	Sample	0.5	1.01970289
8	Sample	0.25	0.837572934
8	Sample	0.125	0.425824441
8	Sample	0.0625	0.310866554
8	Sample	0.03125	-0.029364151
8	Sample	0.015625	-0.040351024
8	Sample	0.0078125	0.001712575
8	Sample	0.00390625	0.112249575
8	Sample	0.001953125	0.025558564
9	Reference	1	1.007177695
9	Reference	0.5	1.045861873
9	Reference	0.25	0.966367963
9	Reference	0.125	0.718322726
9	Reference	0.0625	0.522711073
9	Reference	0.03125	0.189428905
9	Reference	0.015625	0.146450955
9	Reference	0.0078125	0.002819297
9	Reference	0.00390625	-0.072563719
9	Reference	0.001953125	0.025542401
9	Reference	1	0.988383075
9	Reference	0.5	0.958576676
9	Reference	0.25	0.864301448
9	Reference	0.125	0.737613886
9	Reference	0.0625	0.486593477
9	Reference	0.03125	0.246795412
9	Reference	0.015625	0.039097675
9	Reference	0.0078125	-0.028580942
9	Reference	0.00390625	-0.131418519
9	Reference	0.001953125	0.025663174
9	Reference	1	0.992024909
9	Reference	0.5	1.024917537
9	Reference	0.25	0.990465097
9	Reference	0.125	0.772406816
9	Reference	0.0625	0.552150449
9	Reference	0.03125	0.194955582
9	Reference	0.015625	0.023500056
9	Reference	0.0078125	-0.027418299
9	Reference	0.00390625	-0.013555423
9	Reference	0.001953125	0.012324655
9	Sample	1	0.938386463
9	Sample	0.5	0.908340576
9	Sample	0.25	0.773499317
9	Sample	0.125	0.512950082
9	Sample	0.0625	0.177228957
9	Sample	0.03125	0.137910916
9	Sample	0.015625	0.03656839
9	Sample	0.0078125	-0.055963017
9	Sample	0.00390625	-0.012901329
9	Sample	0.001953125	0.026027113
9	Sample	1	0.919203767
9	Sample	0.5	0.915546439
9	Sample	0.25	0.785271976
9	Sample	0.125	0.542393999
9	Sample	0.0625	0.15830325
9	Sample	0.03125	0.0552995
9	Sample	0.015625	-0.013700927
9	Sample	0.0078125	-0.052642868
9	Sample	0.00390625	-0.091517354
9	Sample	0.001953125	0.010009414
9	Sample	1	0.969834795
9	Sample	0.5	0.930254594
9	Sample	0.25	0.694052542
9	Sample	0.125	0.420736222
9	Sample	0.0625	0.133830336
9	Sample	0.03125	0.021709968
9	Sample	0.015625	0.023193587
9	Sample	0.0078125	0.033437947
9	Sample	0.00390625	-0.039820471
9	Sample	0.001953125	-0.142984381
